# Supplementary material
Source: HighWire-hosted journal article supplement (https://heart.bmj.com/content/110/4/e3)

Magnetic Resonance Imaging for patients with cardiac implantable electronic devices

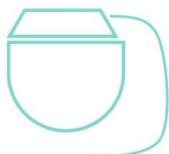

MR Conditional

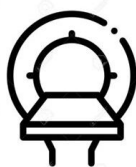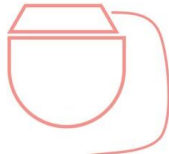

MR Unlabelled\*

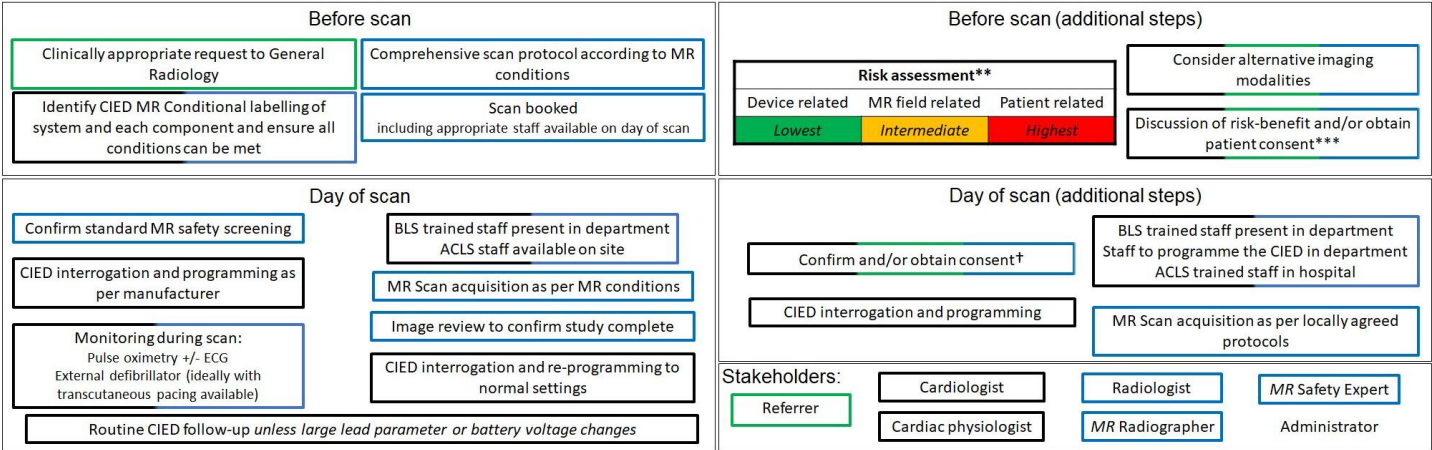

Supplement: inline-supplementary-material-1 [file inline-supplementary-material-1.pdf]
